# Supplementary material
Source: PubMed Central journal article supplement (PMC4169002)
Supplement: NIHMS592709-supplement-Supplemental_material.pdf [file NIHMS592709-supplement-Supplemental_material.pdf]

## SUPPLEMENTAL MATERIAL

**Supplemental Table 1. Previously Reported *LAMP2* Mutations Causing Danon Disease.** Locations of these mutations are visually displayed in **Figure 2**.

| Location          | Mutation                    | Effect-mechanism | Reference    |
|-------------------|-----------------------------|------------------|--------------|
| Promoter          | c.-30_-22delCGCCGCCGT       |                  | 1            |
| 5'UTR +<br>Exon 1 | 34kb deletion               | Large deletion   | 2            |
| Exon 1            | c.14 delG                   | Frameshift       | 3            |
| Exon 1            | c.36_42delAGGGCTC           | Frameshift       | 4            |
| Exon 1            | c.56 T>G                    | Missense (L19R)  | Our database |
| Exon 1            | c.1-?_64+?                  | Large deletion   | 1            |
| IVS-1             | c.64+1 G>A                  | Splicing         | 5            |
| IVS-1             | c.64+1 G>T                  | Splicing         | 6            |
| IVS-1             | c.65-2 A>G                  | Splicing         | 6            |
| Exon 2            | c.102-103 delAG             | Frameshift       | 7            |
| Exon 2            | c.137 G>A                   | Stop codon       | 8            |
| Exon 2            | c.138 G>A                   | Stop codon       | 9            |
| Exon 2            | c.179 delC                  | Frameshift       | 10           |
| IVS-2             | c.183+1 G>A                 | Splicing         | 1            |
| Exon 3            | c.184-190delAAAACCTG        | Frameshift       | Our database |
| Exon 3            | c.189-190delITG             | Frameshift       | 11           |
| Exon 3            | c.241 delG                  | Frameshift       | 12           |
| Exon 3            | c.247 C>T                   | Stop codon       | 1            |
| Exon 3            | c.257_258 delCC             | Frameshift       | 13           |
| Exon 3            | c.288_289 delTT             | Frameshift       | 14           |
| Exon 3            | c.293 G>A                   | Stop codon       | 15           |
| Exon 3            | c.294 G>A                   | Stop codon       | 16, 17       |
| Exon 3            | c.320_321 insCATC           | Frameshift       | 13           |
| Exon 3            | c.327 T>A                   | Stop codon       | 6            |
| Exons 4<br>and 5  | c.397 + 1822_742-705dup6404 | Duplication      | 18           |
| Exons 4–<br>10    | c.398-?_1233+?del           | Large deletion   | 2            |
| Exon 4            | c.405-406 insT              | Frameshift       | Our database |
| Exon 4            | c.440 T>A                   | Stop codon       | 3            |
| Exon 4            | c.467 T>G                   | Stop codon       | 19           |
| Exon 4            | c.470 C>G                   | Stop codon       | 20, 21       |
| Exon 4            | c.507 G>A                   | Stop codon       | 1            |
| Exon 4            | c.520 C>T                   | Stop codon       | 4            |
| Exon 5            | c.573 delA                  | Frameshift       | 22           |
| Exon 5            | c.680–701 del               | Frameshift       | 16           |
| Exon 5            | c.716 delT                  | Frameshift       | 23           |
| Exon 5            | c.737 A>G                   | Missense (D246G) | Our database |

|                          |                                                          |                    |              |
|--------------------------|----------------------------------------------------------|--------------------|--------------|
| IVS-5                    | c.741+1G→A                                               | 6 bp insertion     | 3            |
| Intron 5/Exon 6 Junction | c.742-4_747 del10 GAAGGTTGCT                             | Splicing           | 3, 24        |
| Exon 6                   | c.796-797 insC                                           | Frameshift         | 16           |
| Exon 6                   | c.808 insG                                               | Frameshift         | 13           |
| IVS-6                    | c.864+1 G>C                                              | Splicing           | 3            |
| IVS-6                    | c.864+1 del G                                            | Splicing           | 25           |
| IVS-6                    | c.864+1-4 del GTGA                                       | Splicing           | 6            |
| IVS-6                    | c.864+3-6 del GAGT                                       | Splicing           | 26           |
| IVS-6                    | c.865-3 C>A                                              | Splicing           | 27           |
| IVS-6                    | c.865-2 A>G                                              | Splicing           | 6            |
| IVS-6                    | c.865-1 G>C                                              | Splicing           | 1            |
| Exon 7                   | c.874-897del<br>AACCGATTTTATCTGAAGGAAGTG                 | 24nt deletion      | 28           |
| Exon 7                   | c.877 C>T                                                | Stop codon         | 1, 29        |
| Exon 7                   | c.883-884 insT                                           | Frameshift         | 30           |
| Exon 7                   | c.892 G>T                                                | Stop codon         | 31           |
| Exon 7                   | c.928 G>A                                                | Splicing           | 23, 32, 33   |
| IVS-7                    | c.929_1G>A                                               | Splicing           | 34           |
| Exon 8                   | C813G (incorrect nomenclature- not based on mRNA or CDS) | Stop codon         | 3            |
| Exon 8                   | c.940 delG                                               | Frameshift         | 18           |
| Exon 8                   | c.961 T>C                                                | Missense (W321R)   | 35           |
| Exon 8                   | c.974delTinsAA                                           | Frameshift         | 3            |
| Exon 8                   | c.1075 C>T                                               | Stop codon         | 19           |
| Exon 8                   | c.1075-1076 insC                                         | Frameshift         | 36           |
| Exon 8                   | c.1082 delA                                              | Frameshift         | 37           |
| Exon 8                   | c.1086T>G                                                | Stop codon         | Our database |
| IVS-8                    | c.1093+1 G>C                                             | Splicing           | 38           |
| IVS-8                    | c.1093+2 T>A                                             | Splicing           | 39           |
| Exon 9B                  | c.1097-1098 delAA                                        | Frameshift         | 3            |
| Exon 9B                  | c.1137-1140 del TATA/ins<br>GCTGGTCCCAAT                 | Insertion/deletion | 1            |
| Exon 9B                  | c.1150G>C                                                | Missense (G384R)   | 40, 41       |
| Exon 9B                  | c.1201 A>G                                               | Missense (R401G)   | Our database |
| Exon 9B                  | c.1204 A>T                                               | Stop codon         | 31           |

**Supplemental Table 2. Clinical Manifestations in Danon Disease Males and Females and Typical Hypertrophic Cardiomyopathy.**

|                                 | Danon Disease (Males)                                                                                                                                                                                                                                                                                                                                                                                                                   | Danon Disease (Females)                                                                                                                                                                                                                                    | Hypertrophic Cardiomyopathy (HCM)                                                                                                                                                                                                                                                                                                                    |
|---------------------------------|-----------------------------------------------------------------------------------------------------------------------------------------------------------------------------------------------------------------------------------------------------------------------------------------------------------------------------------------------------------------------------------------------------------------------------------------|------------------------------------------------------------------------------------------------------------------------------------------------------------------------------------------------------------------------------------------------------------|------------------------------------------------------------------------------------------------------------------------------------------------------------------------------------------------------------------------------------------------------------------------------------------------------------------------------------------------------|
| <b>Epidemiology</b>             |                                                                                                                                                                                                                                                                                                                                                                                                                                         |                                                                                                                                                                                                                                                            |                                                                                                                                                                                                                                                                                                                                                      |
|                                 | -Mean Age of:<br>Symptom Onset: 12 years<br>Cardiac transplant: 18 years<br>Death: 19 years <sup>1</sup>                                                                                                                                                                                                                                                                                                                                | -Mean Age of:<br>Symptom Onset: 28 years<br>Cardiac transplant: 34 years<br>Death: 35 years <sup>1</sup>                                                                                                                                                   | - 3:2 male predominance (59%) <sup>42</sup><br><br>- Mean Age of Symptom Onset: 38 (Males), 47 (Females) <sup>42</sup><br><br>- Mean Age of Death: 45 (sudden death), 56 (congestive heart failure), 73 (ischemic stroke); no significant gender differences <sup>43</sup>                                                                           |
| <b>Cardiac</b>                  |                                                                                                                                                                                                                                                                                                                                                                                                                                         |                                                                                                                                                                                                                                                            |                                                                                                                                                                                                                                                                                                                                                      |
| <b>Cardiomyopathy</b>           |                                                                                                                                                                                                                                                                                                                                                                                                                                         |                                                                                                                                                                                                                                                            |                                                                                                                                                                                                                                                                                                                                                      |
|                                 | - ~100% with some form of cardiomyopathy (88% hypertrophic form and 12% dilated form) <sup>1</sup><br><br>- Hypertrophic form: preserved ejection fraction and cavity dimensions early in disease (hypertrophy can be severe); reduced ejection fraction, arrhythmias, and heart failure develop later in disease course<br><br>- Usually the cause of death, either from heart failure or associated electrical conduction abnormality | - ~61-100% with some form of cardiomyopathy (33% hypertrophic form and 28% dilated form) <sup>1, 24</sup><br><br>- Although symptoms present at later ages, cardiomyopathy can cause significant morbidity and mortality                                   | - Modes of death include sudden death (51% of cases), heart failure (36% of cases), and HCM-related ischemic stroke (13% of cases) <sup>43</sup><br><br>- Diagnosis of HCM based on echocardiographic criteria with left ventricular wall thickness $\geq 15$ mm in adults. <sup>43</sup> HCM may remain stable without progression in many patients |
| <b>Electrical Abnormalities</b> |                                                                                                                                                                                                                                                                                                                                                                                                                                         |                                                                                                                                                                                                                                                            |                                                                                                                                                                                                                                                                                                                                                      |
|                                 | - 86-100% with some form of electrical abnormality <sup>1, 24</sup><br><br>- WPW most common (69% of cases) <sup>1</sup>                                                                                                                                                                                                                                                                                                                | - 80-100% with some form of electrical abnormality <sup>1, 24</sup><br><br>- WPW noted in 27% of cases <sup>1</sup>                                                                                                                                        | - The most common arrhythmias are atrial fibrillation <sup>44, 45</sup> and ventricular arrhythmias. <sup>45, 46</sup> Specific ventricular arrhythmias include isolated ventricular extrasystoles <sup>46</sup> and non-sustained ventricular tachycardia. <sup>45</sup><br><br>- WPW is uncommon finding in non-Danon HCM <sup>47</sup>            |
| <b>Neurological</b>             |                                                                                                                                                                                                                                                                                                                                                                                                                                         |                                                                                                                                                                                                                                                            |                                                                                                                                                                                                                                                                                                                                                      |
| <b>Skeletal Myopathy</b>        |                                                                                                                                                                                                                                                                                                                                                                                                                                         |                                                                                                                                                                                                                                                            |                                                                                                                                                                                                                                                                                                                                                      |
|                                 | - 80-90% with skeletal muscle weakness, usually in shoulder, neck, and legs <sup>1, 24</sup><br><br>- Mean serum creatine kinase of 944 $\pm$ 327 U/L <sup>1</sup><br><br>- Usually retain ability to walk as adults<br><br>- Neuropathy in 9% of cases <sup>1</sup>                                                                                                                                                                    | - 33-50% with skeletal muscle weakness, usually in shoulder, neck, and legs <sup>1, 24</sup><br><br>- Mean serum creatine kinase of 106 $\pm$ 104 U/L <sup>1</sup><br><br>- Ambulation largely unaffected<br><br>- Neuropathy in 39% of cases <sup>1</sup> | -No significant skeletal muscle involvement or neuropathy                                                                                                                                                                                                                                                                                            |

|                                                                                                                                                                                                                                      |                                                                                                                                                                                                                                                   |                                                                                                                                                                            |                                               |
|--------------------------------------------------------------------------------------------------------------------------------------------------------------------------------------------------------------------------------------|---------------------------------------------------------------------------------------------------------------------------------------------------------------------------------------------------------------------------------------------------|----------------------------------------------------------------------------------------------------------------------------------------------------------------------------|-----------------------------------------------|
|                                                                                                                                                                                                                                      | - Muscle cramping in 9% of cases <sup>1</sup>                                                                                                                                                                                                     | -Muscle cramping in 15% of cases <sup>1</sup>                                                                                                                              |                                               |
| <b>Intellectual Disability</b>                                                                                                                                                                                                       |                                                                                                                                                                                                                                                   |                                                                                                                                                                            |                                               |
|                                                                                                                                                                                                                                      | - 70-100% with cognitive impairment <sup>1,24</sup><br><br>- Some case studies have noted depression, paranoia, attention deficit, and behavior problems                                                                                          | - 6-47% with cognitive impairment <sup>1,24</sup>                                                                                                                          | - Normal cognitive function                   |
| <b>Ocular Disease</b>                                                                                                                                                                                                                |                                                                                                                                                                                                                                                   |                                                                                                                                                                            |                                               |
|                                                                                                                                                                                                                                      | - 69% with visual problems <sup>1</sup><br><br>- Examination may reveal central scotoma, serious color vision disturbances, diffuse and near-complete loss of retinal pigment, and a cone-rod pattern of amplitude reduction on electroretinogram | - 64% with visual problems <sup>1</sup><br><br>- Examination may reveal peripheral pigmentary retinopathy, and peppered and granular retinal pigment epithelium appearance | - No significant ocular involvement           |
| <b>Other Manifestations</b>                                                                                                                                                                                                          |                                                                                                                                                                                                                                                   |                                                                                                                                                                            |                                               |
| <b>Respiratory Disease*</b>                                                                                                                                                                                                          |                                                                                                                                                                                                                                                   |                                                                                                                                                                            |                                               |
|                                                                                                                                                                                                                                      | - 50% with symptomatic respiratory disease <sup>1</sup>                                                                                                                                                                                           | - 17% with symptomatic respiratory disease <sup>1</sup>                                                                                                                    | - No significant respiratory involvement      |
| <b>Gastrointestinal Disease*</b>                                                                                                                                                                                                     |                                                                                                                                                                                                                                                   |                                                                                                                                                                            |                                               |
|                                                                                                                                                                                                                                      | - 77% with unspecified gastrointestinal symptoms <sup>1</sup>                                                                                                                                                                                     | - 50% with unspecified gastrointestinal symptoms <sup>1</sup>                                                                                                              | - No significant gastrointestinal involvement |
| * = There are no studies confirming pulmonary or gastrointestinal involvement in Danon disease; statistics are presented here to show the high number of Danon disease patients reporting these symptoms; WPW-Wolff Parkinson White; |                                                                                                                                                                                                                                                   |                                                                                                                                                                            |                                               |

## Supplemental References

1. Boucek D, Jirikowic J, Taylor M. Natural history of danon disease. *Genet Med*. 2011;13:563-568
2. Yang Z, Funke BH, Cripe LH, Vick GW, Mancini-Dinardo D, Peña LS, Kanter RJ, Wong B, Westerfield BH, Varela JJ, Fan Y, Towbin JA, Vatta M. Lamp2 microdeletions in patients with danon disease. *Circ Cardiovasc Genet*. 2010;3:129-137
3. Nishino I, Fu J, Tanji K, Yamada T, Shimojo S, Koori T, Mora M, Riggs JE, Oh SJ, Koga Y, Sue CM, Yamamoto A, Murakami N, Shanske S, Byrne E, Bonilla E, Nonaka I, DiMauro S, Hirano M. Primary lamp-2 deficiency causes x-linked vacuolar cardiomyopathy and myopathy (danon disease). *Nature*. 2000;406:906-910
4. Charron P, Villard E, Sébillon P, Laforêt P, Maisonobe T, Duboscq-Bidot L, Romero N, Drouin-Garraud V, Frébourg T, Richard P, Eymard B, Komajda M. Danon's disease as a cause of hypertrophic cardiomyopathy: A systematic survey. *Heart*. 2004;90:842-846
5. Alroy J, Pfannl R, Slavov D, Taylor MR. Electron microscopic findings in skin biopsies from patients with danon disease. *Ultrastruct Pathol*. 2010;34:333-336
6. Arad M, Maron BJ, Gorham JM, Johnson WH, Saul JP, Perez-Atayde AR, Spirito P, Wright GB, Kanter RJ, Seidman CE, Seidman JG. Glycogen storage diseases presenting as hypertrophic cardiomyopathy. *N Engl J Med*. 2005;352:362-372
7. Echaniz-Laguna A, Mohr M, Epailly E, Nishino I, Charron P, Richard P, Guiraud-Chaumeil C, Tranchant C. Novel lamp-2 gene mutation and successful treatment with heart transplantation in a large family with danon disease. *Muscle Nerve*. 2006;33:393-397
8. Fidzianska A, Madej-Pilarczyk A, Walczak E, Kuch M. Morphologic and clinical aspects of danon disease in a patient with a mutation c.137g > a in the lamp-2 gene. *Neuropediatrics*. 2013;44:276-280
9. Balmer C, Ballhausen D, Bosshard NU, Steinmann B, Boltshauser E, Bauersfeld U, Superti-Furga A. Familial x-linked cardiomyopathy (danon disease): Diagnostic confirmation by mutation analysis of the lamp2gene. *Eur J Pediatr*. 2005;164:509-514
10. Regelsberger G, Höftberger R, Pickl WF, Zlabinger GJ, Körmöczy U, Salzer-Muhar U, Luckner D, Bodamer OA, Mayr JA, Muss WH, Budka H, Bernheimer H. Danon disease: Case report and detection of new mutation. *J Inherit Metab Dis*. 2009;32 Suppl 1:S115-122
11. He J, Wang Y, Jiang T. Danon disease : A novel mutation in the lamp-2 gene and ophthalmic abnormality. *Herz*. 2013 [Epub ahead of date]
12. Kim H, Cho A, Lim BC, Kim MJ, Kim KJ, Nishino I, Hwang YS, Chae JH. A 13-year-old girl with proximal weakness and hypertrophic cardiomyopathy with danon disease. *Muscle Nerve*. 2010;41:879-882
13. Cheng Z, Cui Q, Tian Z, Xie H, Chen L, Fang L, Zhu K, Fang Q. Danon disease as a cause of concentric left ventricular hypertrophy in patients who underwent endomyocardial biopsy. *Eur Heart J*. 2012;33:649-656
14. Tada H, Harimura Y, Yamasaki H, Sekiguchi Y, Ishizu T, Seo Y, Kawano S, Aonuma K. Utility of real-time 3-dimensional echocardiography and magnetic resonance imaging for evaluation of danon disease. *Circulation*. 2010;121:e390-392
15. Toib A, Grange DK, Kozel BA, Ewald GA, White FV, Canter CE. Distinct clinical and histopathological presentations of danon cardiomyopathy in young women. *J Am Coll Cardiol*. 2010;55:408-410
16. Fanin M, Nascimbeni AC, Fulizio L, Spinazzi M, Melacini P, Angelini C. Generalized lysosome-associated membrane protein-2 defect explains multisystem clinical involvement and allows leukocyte diagnostic screening in danon disease. *Am J Pathol*. 2006;168:1309-1320

17. Miani D, Taylor M, Mestroni L, D'Aurizio F, Finato N, Fanin M, Brigido S, Proclemer A. Sudden death associated with danon disease in women. *Am J Cardiol.* 2012;109:406-411
18. Majer F, Pelak O, Kalina T, Vlaskova H, Dvorakova L, Honzik T, Palecek T, Kuchynka P, Masek M, Zeman J, Elleder M, Sikora J. Mosaic tissue distribution of the tandem duplication of lamp2 exons 4 and 5 demonstrates the limits of danon disease cellular and molecular diagnostics. *J Inherit Metab Dis.* 2014;37:117-124
19. Yang Z, McMahon CJ, Smith LR, Bersola J, Adesina AM, Breinholt JP, Kearney DL, Dreyer WJ, Denfield SW, Price JF, Grenier M, Kertesz NJ, Clunie SK, Fernbach SD, Southern JF, Berger S, Towbin JA, Bowles KR, Bowles NE. Danon disease as an underrecognized cause of hypertrophic cardiomyopathy in children. *Circulation.* 2005;112:1612-1617
20. Lobrinus JA, Schorderet DF, Payot M, Jeanrenaud X, Bottani A, Superti-Furga A, Schlaepfer J, Fromer M, Jeannet PY. Morphological, clinical and genetic aspects in a family with a novel lamp-2 gene mutation (danon disease). *Neuromuscul Disord.* 2005;15:293-298
21. Schorderet DF, Cottet S, Lobrinus JA, Borruat FX, Balmer A, Munier FL. Retinopathy in danon disease. *Arch Ophthalmol.* 2007;125:231-236
22. Dougu N, Joho S, Shan L, Shida T, Matsuki A, Uese K, Hirono K, Ichida F, Tanaka K, Nishino I, Inoue H. Novel lamp-2 mutation in a family with danon disease presenting with hypertrophic cardiomyopathy. *Circ J.* 2009;73:376-380
23. Sabourdy F, Michelakakis H, Anastasakis A, Garcia V, Mavridou I, Nieto M, Pons MC, Skiadas C, Moraitou M, Manta P, Elleder M, Levade T. Danon disease: Further clinical and molecular heterogeneity. *Muscle Nerve.* 2009;39:837-844
24. Sugie K, Yamamoto A, Murayama K, Oh SJ, Takahashi M, Mora M, Riggs JE, Colomer J, Iturriaga C, Meloni A, Lamperti C, Saitoh S, Byrne E, DiMauro S, Nonaka I, Hirano M, Nishino I. Clinicopathological features of genetically confirmed danon disease. *Neurology.* 2002;58:1773-1778
25. Cottinet SL, Bergemer-Fouquet AM, Toutain A, Sabourdy F, Maakaroun-Vermesse Z, Levade T, Chantepie A, Labarthe F. Danon disease: Intrafamilial phenotypic variability related to a novel lamp-2 mutation. *J Inherit Metab Dis.* 2011;34:515-522
26. Bui YK, Renella P, Martinez-Agosto JA, Verity A, Madikians A, Alejos JC. Danon disease with typical early-onset cardiomyopathy in a male: Focus on a novel lamp-2 mutation. *Pediatr Transplant.* 2008;12:246-250
27. Nadeau A, Therrien C, Karpati G, Sinnreich M. Danon disease due to a novel splice mutation in the lamp2 gene. *Muscle Nerve.* 2008;37:338-342
28. Lacoste-Collin L, Garcia V, Uro-Coste E, Arné-Bes MC, Durand D, Levade T, Delisle MB. Danon's disease (x-linked vacuolar cardiomyopathy and myopathy): A case with a novel lamp-2 gene mutation. *Neuromuscul Disord.* 2002;12:882-885
29. Iacone M, Iacovoni A, Marchetti D, Ferrazzi P. Gene symbol: Lamp2. Disease: Danon disease. *Hum Genet.* 2008;123:537
30. Takahashi M, Yamamoto A, Takano K, Sudo A, Wada T, Goto Y, Nishino I, Saitoh S. Germline mosaicism of a novel mutation in lysosome-associated membrane protein-2 deficiency (danon disease). *Ann Neurol.* 2002;52:122-125
31. Hong D, Shi Z, Wang Z, Yuan Y. Danon disease caused by two novel mutations of the lamp2 gene: Implications for two ends of the clinical spectrum. *Clin Neuropathol.* 2012;31:224-231
32. Burusnukul P, de Los Reyes EC, Yinger J, Boué DR. Danon disease: An unusual presentation of autism. *Pediatr Neurol.* 2008;39:52-54
33. Bertini E, Donati MA, Broda P, Cassandrini D, Petrini S, Dionisi-Vici C, Ballerini L, Boldrini R, D'Amico A, Pasquini E, Minetti C, Santorelli FM, Bruno C. Phenotypic heterogeneity in two

- unrelated danon patients associated with the same lamp-2 gene mutation. *Neuropediatrics*. 2005;36:309-313
34. Horváth J, Ketelsen UP, Geibel-Zehender A, Boehm N, Olbrich H, Korinthenberg R, Omran H. Identification of a novel lamp2 mutation responsible for x-chromosomal dominant danon disease. *Neuropediatrics*. 2003;34:270-273
  35. Musumeci O, Rodolico C, Nishino I, Di Guardo G, Migliorato A, Aguenouz M, Mazzeo A, Messina C, Vita G, Toscano A. Asymptomatic hyperckemia in a case of danon disease due to a missense mutation in lamp-2 gene. *Neuromuscul Disord*. 2005;15:409-411
  36. Viéitez I, Teijeira S, Miranda S, San Millán B, Navarro C. Gene symbol: Lamp2. Disease: Glycogen storage disease 2b. *Hum Genet*. 2008;123:113
  37. Taylor MR, Ku L, Slavov D, Cavanaugh J, Boucek M, Zhu X, Graw S, Carniel E, Barnes C, Quan D, Prall R, Lovell MA, Mierau G, Ruegg P, Mandava N, Bristow MR, Towbin JA, Mestroni L, Registry FC. Danon disease presenting with dilated cardiomyopathy and a complex phenotype. *J Hum Genet*. 2007;52:830-835
  38. Di Blasi Z, Harkness E, Ernst E, Georgiou A, Kleijnen J. Influence of context effects on health outcomes: A systematic review. *Lancet*. 2001;357:757-762
  39. Tuñón T, Guerrero D, Urchaga A, Nishino I, Ayuso T, Matsuda Y, Caballero MC, Berjón J, Imizcoz MA. Danon disease: A novel lamp-2 gene mutation in a family with four affected members. *Neuromuscul Disord*. 2008;18:167-174
  40. Thiadens AA, Slingerland NW, Florijn RJ, Visser GH, Riemsdag FC, Klaver CC. Cone-rod dystrophy can be a manifestation of danon disease. *Graefes Arch Clin Exp Ophthalmol*. 2012;250:769-774
  41. van der Kooi AJ, van Langen IM, Aronica E, van Doorn PA, Wokke JH, Brusse E, Langerhorst CT, Bergin P, Dekker LR, dit Deprez RH, de Visser M. Extension of the clinical spectrum of danon disease. *Neurology*. 2008;70:1358-1359
  42. Olivotto I, Maron MS, Adabag AS, Casey SA, Vargiu D, Link MS, Udelson JE, Cecchi F, Maron BJ. Gender-related differences in the clinical presentation and outcome of hypertrophic cardiomyopathy. *J Am Coll Cardiol*. 2005;46:480-487
  43. Maron BJ, Olivotto I, Spirito P, Casey SA, Bellone P, Gohman TE, Graham KJ, Burton DA, Cecchi F. Epidemiology of hypertrophic cardiomyopathy-related death: Revisited in a large non-referral-based patient population. *Circulation*. 2000;102:858-864
  44. Bockstall KE, Link MS. A primer on arrhythmias in patients with hypertrophic cardiomyopathy. *Curr Cardiol Rep*. 2012;14:552-562
  45. Babuty D, Fauchier L, Nguyen D, Giraudeau C, Marie O, Fauchier JP, Cosnay P. [arrhythmias of primary hypertrophic cardiomyopathy]. *Arch Mal Coeur Vaiss*. 2003;96 Spec No 7:7-15
  46. Bjarnason I, Hardarson T, Jonsson S. Cardiac arrhythmias in hypertrophic cardiomyopathy. *Br Heart J*. 1982;48:198-203
  47. MacRae CA, Ghaisas N, Kass S, Donnelly S, Basson CT, Watkins HC, Anan R, Thierfelder LH, McGarry K, Rowland E. Familial hypertrophic cardiomyopathy with wolff-parkinson-white syndrome maps to a locus on chromosome 7q3. *J Clin Invest*. 1995;96:1216-1220
